# Supplementary material for: Assessing treatment outcomes of chemoimmunotherapy in extensive-stage small cell lung cancer: an integrated clinical and radiomics approach
Source: PubMed Central journal article supplement — J Immunother Cancer. 2023 Sep 20;11(9):e007492. doi: 10.1136/jitc-2023-007492 (PMC10514620; doi:10.1136/jitc-2023-007492), 2023-09-20
Supplement: jitc-2023-007492supp005.pdf [file jitc-2023-007492supp005.pdf]

**Table S1. Results of multicollinearity diagnostic between radio-score and clinical feature**

| Variables                     | Tolerance | VIF   |
|-------------------------------|-----------|-------|
| Radio-score                   | 0.270     | 3.709 |
| Age                           | 0.924     | 1.082 |
| Sex                           | 0.440     | 2.274 |
| Smoking status                | 0.411     | 2.433 |
| ECOG                          | 0.879     | 1.138 |
| T stage <sup>a</sup>          | 0.835     | 1.197 |
| N stage <sup>a</sup>          | 0.471     | 2.124 |
| M stage <sup>a</sup>          | 0.572     | 1.749 |
| Brain metastases <sup>b</sup> | 0.913     | 1.095 |
| Liver metastases              | 0.788     | 1.229 |
| LIPI                          | 0.559     | 1.789 |
| Drug                          | 0.861     | 1.162 |
| irAE                          | 0.938     | 1.066 |

Abbreviations: VIF, variance inflation factor; ECOG, Eastern Cooperative Oncology Group; CNS, central nervous system; LIPI, lung immune prognostic index; CR, complete response; PR, partial response; SD, stable disease; PD, progressive disease.

<sup>a</sup>Disease stage at diagnosis classified according to American Joint Committee on Cancer, 8th edition, Tumor-Node-Metastasis (TNM) staging system.

<sup>b</sup>Best objective response was evaluated according to Response Evaluation Criteria in Solid Tumors (RECIST), version 1.1.
