# Supplementary figures and images for: Assessing treatment outcomes of chemoimmunotherapy in extensive-stage small cell lung cancer: an integrated clinical and radiomics approach
Source: PubMed Central journal article supplement — J Immunother Cancer. 2023 Sep 20;11(9):e007492. doi: 10.1136/jitc-2023-007492 (PMC10514620; doi:10.1136/jitc-2023-007492), 2023-09-20

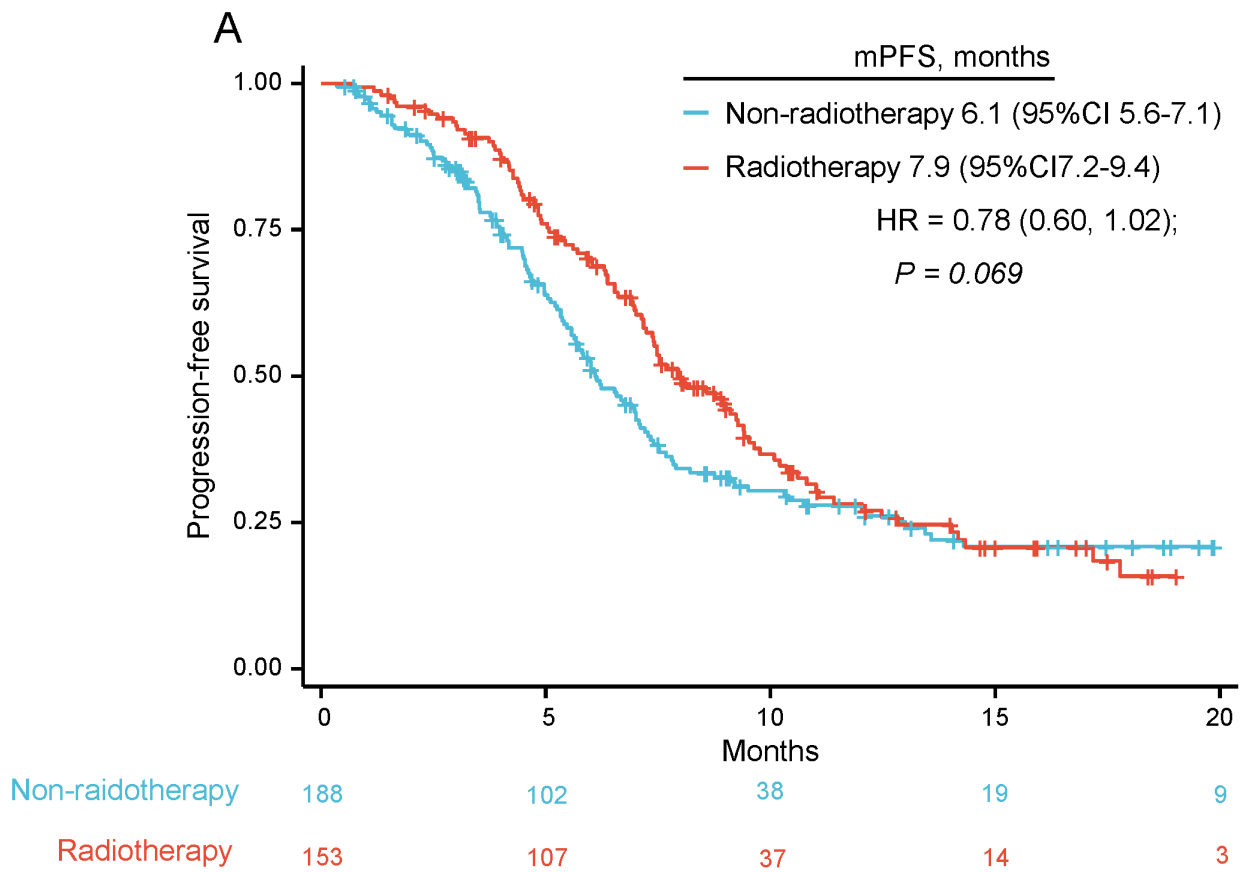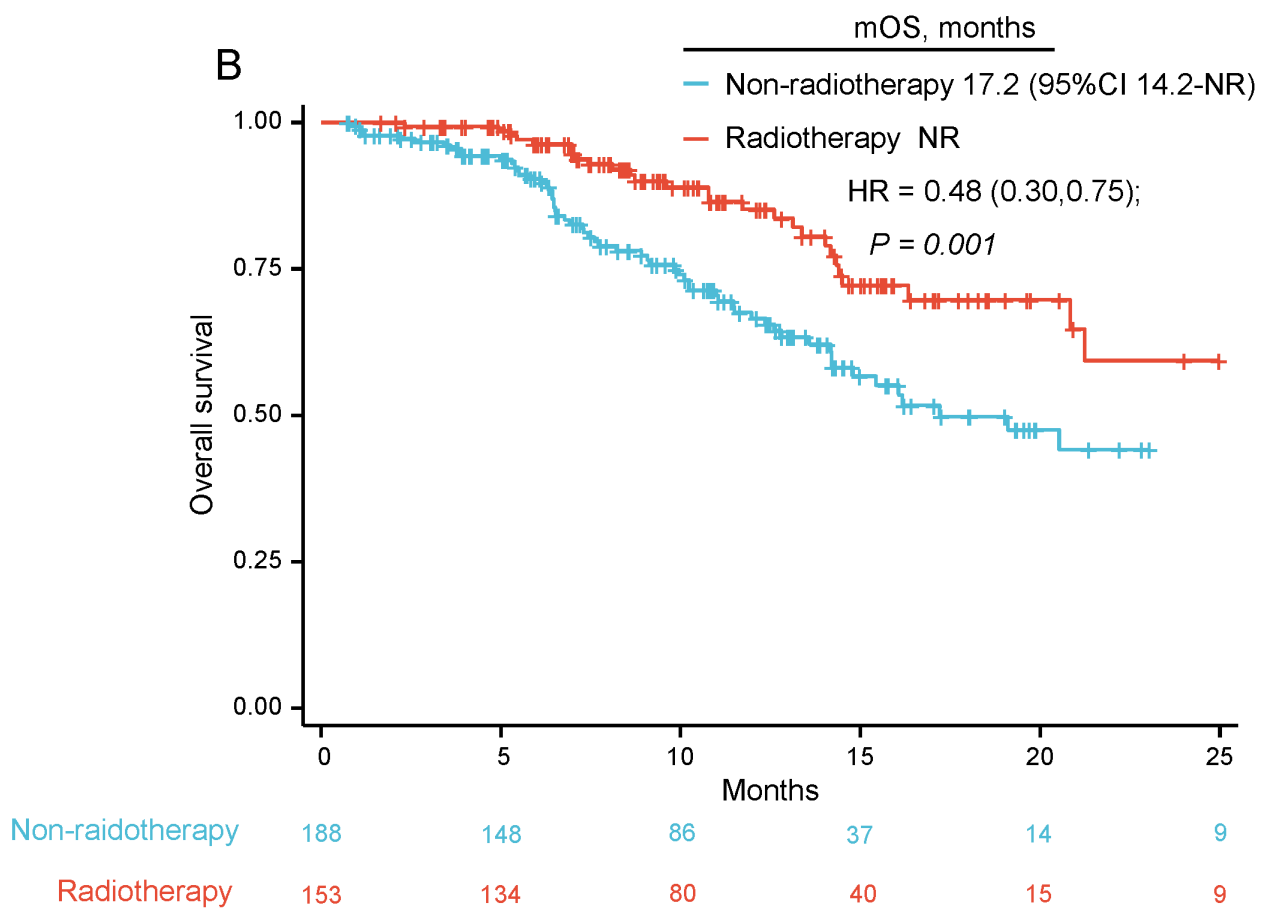

Supplement: jitc-2023-007492supp002.pdf [file jitc-2023-007492supp002.pdf]

Spearman Rank Correlation

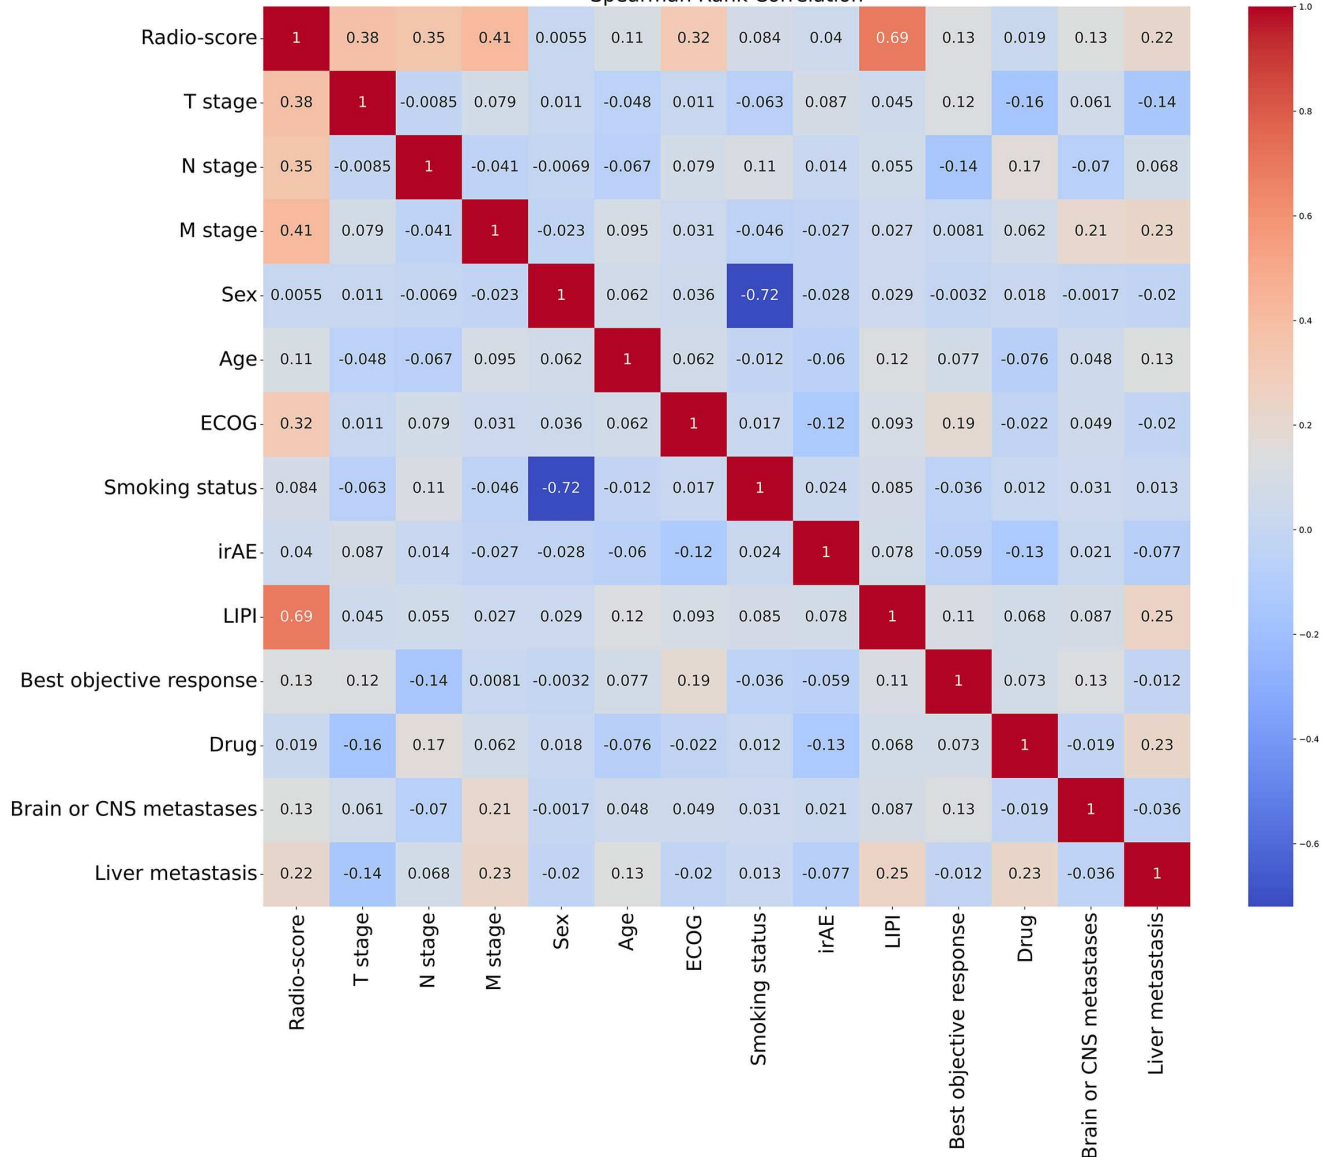

Supplement: jitc-2023-007492supp003.pdf [file jitc-2023-007492supp003.pdf]

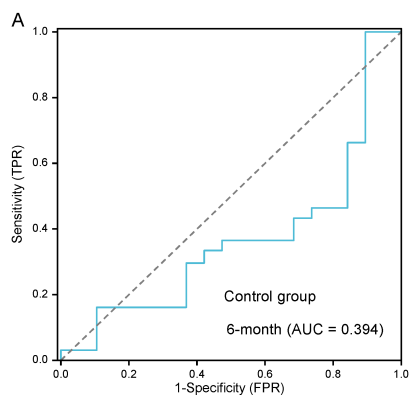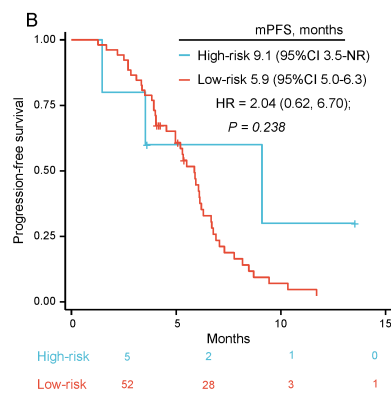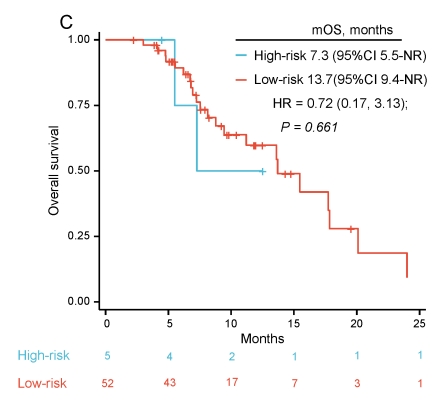

Supplement: jitc-2023-007492supp004.pdf [file jitc-2023-007492supp004.pdf]
